# Supplementary material for: Molecular reconstruction of recurrent evolutionary switching in olfactory receptor specificity
Source: eLife. 2021 Oct 22;10:e69732. doi: 10.7554/eLife.69732 (PMC8575457; doi:10.7554/eLife.69732)
Supplement: Figure 1—source data 1. — The same responses z-scored (Figure 1E) and the results of the principal component analysis (PCA), showing loadings and variance explained by each PC (Figure 1D). Here and in subsequent source data files ‘NaN’ (‘not a number’) indicates cases where data were not available, usually due to the electrode coming out of the sensillum before the end of the series of stimulations. [file elife-69732-fig1-data1.xlsx]

## Sheet: Odor responses & PCA
Figure 1 source data 1
Species	C1_formic acid	C2_acetic acid	C3_propionic acid	C4_butyric acid	C5_pentanoic acid	C6_hexanoic acid		z-scored
Dmel	4	70	12	20	0	-6		-0.457705	1.92718	-0.168628	0.120449	-0.602244	-0.819051		Loadings	PC1	PC2	PC3			variance explained
Dmel	26	50	28	10	24	-2		0.188874	1.54877	0.302199	-0.717722	0.0755497	-1.39767		formic	-0.202425	-0.278341	-0.209291		PC1	67.5095
Dmel	6	34	12	-2	12	-20		-0.0560772	1.51408	0.280386	-0.504695	0.280386	-1.51408		acetic	-0.64117	-0.226503	0.236658		PC2	11.6156
Dmel	0	30	12	-8	-14	-28		0.065414	1.53723	0.65414	-0.32707	-0.621433	-1.30828		propionic	-0.0123906	0.863508	-0.213014		PC3	11.3119
Dmel	36	48	18	6	-8	-18		0.879056	1.35138	0.170563	-0.301766	-0.852816	-1.24642		butyric	0.720101	-0.297245	-0.055776		PC4	5.87604
Dmoj	NaN	0	52	100	12	NaN		NaN	-0.907459	0.243465	1.30586	-0.641861	NaN		pentanoic	0.166942	0.102809	0.766546		PC5	3.61867
Dmoj	-12	18	32	108	22	-6		-0.904194	-0.20866	0.115922	1.87794	-0.115922	-0.765087		hexanoic	-0.0368314	-0.163259	-0.513918		PC6	0.0682839
Dmoj	20	18	32	150	18	-12		-0.31034	-0.345473	-0.0995429	1.97329	-0.345473	-0.872465
Dmoj	4	-14	14	144	-14	-26		-0.220962	-0.505056	-0.063132	1.98866	-0.505056	-0.694452
Dmoj	6	4	4	62	-4	-18		-0.109312	-0.182186	-0.182186	1.93117	-0.473683	-0.983804
Dmoj	24	10	48	62	-14	12		0.012086	-0.495525	0.882276	1.38989	-1.36571	-0.423009
Dvir	30	10	52	72	16	-10		0.0560096	-0.616106	0.795337	1.46745	-0.414471	-1.28822
Dvir	-8	-2	8	24	0	-20		-0.55997	-0.156792	0.515172	1.59031	-0.0223988	-1.36633
Dvir	-12	-22	22	52	-16	0		-0.56739	-0.922009	0.638314	1.70217	-0.709238	-0.141848
Dvir	NaN	-8	10	14	NaN	NaN		NaN	-1.13776	0.398216	0.739544	NaN	NaN
Dvir	-12	8	48	26	-12	-24		-0.648098	0.0855979	1.55299	0.745924	-0.648098	-1.08832
Dvir	38	30	34	44	-6	10		0.681011	0.261927	0.471469	0.995324	-1.62395	-0.785782
Dvir	24	8	104	88	-4	0		-0.26824	-0.607069	1.42591	1.08708	-0.86119	-0.776483
Dwil	-30	-14	NaN	116	NaN	NaN		-0.674368	-0.474555	NaN	1.14892	NaN	NaN
Dwil	-18	12	-18	76	-10	-14		-0.617672	0.199835	-0.617672	1.94385	-0.39967	-0.508671
Dwil	0	12	42	76	30	-30		-0.593336	-0.264719	0.556823	1.48791	0.228206	-1.41488
Dwil	6	16	18	90	10	-28		-0.326849	-0.0688102	-0.0172026	1.84067	-0.223633	-1.20418
Dwil	NaN	-12	2	126	14	-14		NaN	-0.600924	-0.36192	1.75497	-0.15706	-0.635068
Dwil	10	36	20	74	8	NaN		-0.721095	0.23546	-0.35319	1.6335	-0.794676	NaN
Dwil	6	18	18	64	36	-2		-0.730729	-0.22484	-0.22484	1.7144	0.533994	-1.06799
Dwil	8	42	56	68	28	-20		-0.689134	0.359995	0.79199	1.16227	-0.0719991	-1.55312
Dere	24	80	36	10	8	-28		0.0652017	1.63004	0.400525	-0.326008	-0.381896	-1.38786
Dere	18	54	104	0	2	-10		-0.229949	0.597867	1.74761	-0.643857	-0.597867	-0.873806
Dere	18	100	48	8	-4	-4		-0.239707	1.79367	0.504211	-0.48768	-0.785247	-0.785247
Dere	22	68	58	34	0	0		-0.290753	1.3142	0.965299	0.127931	-1.05834	-1.05834
Dere	-4	48	46	-16	34	-18		-0.611822	1.06264	0.998236	-0.998236	0.611822	-1.06264
Dere	34	48	34	8	-34	-24		0.682039	1.09719	0.682039	-0.0889616	-1.33442	-1.03789
Dana	50	48	18	26	20	12		1.30136	1.17742	-0.681667	-0.185909	-0.557727	-1.05349
Dana	18	54	18	6	2	26		-0.143889	1.79861	-0.143889	-0.791387	-1.00722	0.287777
Dana	36	60	48	-2	-30	-16		0.541372	1.19102	0.866195	-0.487234	-1.24515	-0.866195
Dana	44	112	42	16	-38	10		0.26234	1.63458	0.22198	-0.3027	-1.39242	-0.42378
Dana	18	130	54	-2	-36	-36		-0.0526976	1.71794	0.516436	-0.368883	-0.906399	-0.906399
Dana	34	190	70	8	-30	-22		-0.0941034	1.8207	0.347774	-0.413237	-0.879662	-0.781468
Dana	46	100	50	12	6	-4		0.284741	1.68256	0.388283	-0.595368	-0.750681	-1.00954
Dyak	16	22	18	-8	-12	NaN		0.553033	0.9301	0.678722	-0.955238	-1.20662	NaN
Dyak	34	66	48	-8	-2	-2		0.365579	1.3978	0.817176	-0.989213	-0.795671	-0.795671
Dyak	76	142	70	22	20	-2		0.406112	1.66252	0.291893	-0.621859	-0.659932	-1.07874
Dyak	4	60	18	36	-4	-10		-0.500438	1.6014	0.0250219	0.700613	-0.800701	-1.0259
Dyak	44	118	58	38	26	6		-0.11292	1.8154	0.251898	-0.26927	-0.581971	-1.10314
Dpse	20	84	68	12	8	16		-0.449073	1.51052	1.02062	-0.694022	-0.816497	-0.571548
Dpse	20	44	12	0	-24	28		0.283069	1.30212	-0.0566139	-0.566139	-1.58519	0.622752
Dpse	30	78	52	30	4	-4		-0.0549285	1.52701	0.670127	-0.0549285	-0.911813	-1.17547
Dpse	14	134	90	12	-30	-6		-0.345185	1.56661	0.865617	-0.377048	-1.04617	-0.663816
Dpse	6	38	52	18	2	NaN		-0.806171	0.693682	1.34987	-0.243726	-0.993653	NaN
Dpse	40	68	60	40	14	14		0.0296174	1.27355	0.918141	0.0296174	-1.12546	-1.12546
Dsim	48	104	74	6	14	44		-0.00907398	1.51535	0.698696	-1.1524	-0.93462	-0.117962
Dsim	80	118	120	100	56	52		-0.256949	1.01662	1.08365	0.413352	-1.06131	-1.19537
Dsim	22	52	18	4	4	-2		0.287139	1.80729	0.0844527	-0.62495	-0.62495	-0.92898
Dsim	36	112	78	20	-6	10		-0.126437	1.5693	0.810683	-0.483435	-1.06356	-0.706559
Dsim	10	58	64	22	-12	8		-0.499889	1.09976	1.29971	-0.0999778	-1.23306	-0.566541
Dsim	46	112	78	24	48	-14		-0.0691384	1.45191	0.668338	-0.576153	-0.0230461	-1.45191
Dsec	-2	86	150	320	76	14		-0.929702	-0.181405	0.36281	1.80838	-0.266439	-0.793648
Dsec	26	36	96	134	42	10		-0.65953	-0.449042	0.813888	1.61374	-0.322749	-0.996311
Dsec	42	38	108	158	80	36		-0.715688	-0.797481	0.633895	1.65631	0.0613447	-0.838377
Dsec	70	56	234	184	82	16		-0.442652	-0.610142	1.51937	0.921195	-0.299089	-1.08868
Dsec	-8	34	96	128	46	12		-1.15175	-0.336467	0.86705	1.48822	-0.103528	-0.763521
Dsec	-2	18	72	140	54	-54		-0.599222	-0.299611	0.509338	1.52801	0.239689	-1.37821
